# Supplementary material for: Jasmonate induced alternative splicing responses in Arabidopsis
Source: PubMed Central journal article supplement (PMC7450174; doi:10.1002/pld3.245), 2020-08-26
Supplement: PLD3-4-e00245-s003.pdf [file PLD3-4-e00245-s003.pdf]

***The Plant Journal* Supporting Information**

Article title: Jasmonate Induced Alternative Splicing Responses in Arabidopsis

Authors: Guanqiao Feng, Mi-Jeong Yoo, Ruth Davenport, J. Lucas Boatwright, Jin Koh, Sixue Chen, W. Brad Barbazuk\*

The following supporting information is available for this article:

Differential AS

Treatment  
no vs. 10 $\mu$ M MeJA

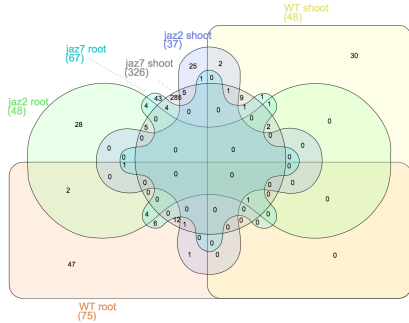

Differential exp.

Treatment  
no vs. 10 $\mu$ M MeJA

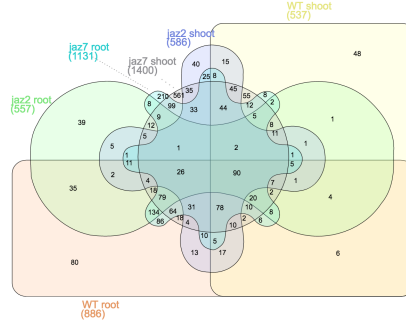

Tissue  
root vs. shoot

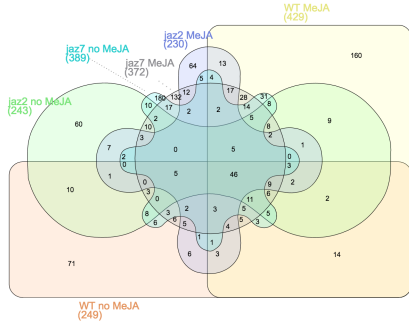

Tissue  
root vs. shoot

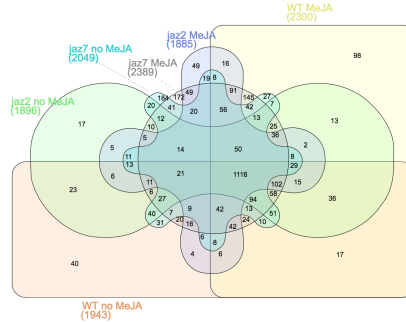

Genotype  
WT vs. *jaz2* or  
WT vs. *jaz7* or  
*jaz2* vs. *jaz7*

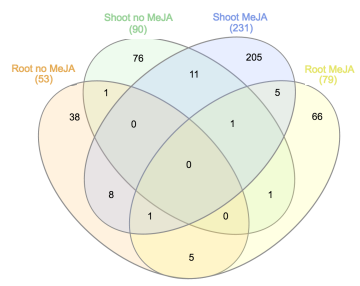

Genotype  
WT vs. *jaz2* or  
WT vs. *jaz7* or  
*jaz2* vs. *jaz7*

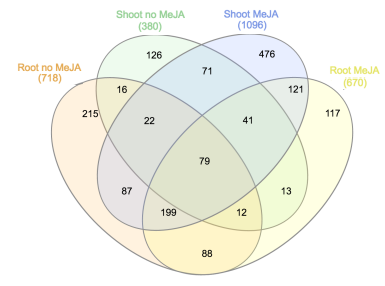

**Figure S1.** Venn diagram of genes that exhibit differential expression or differential AS in response to treatment (MeJA), between tissues (root and shoots) and between mutant backgrounds.

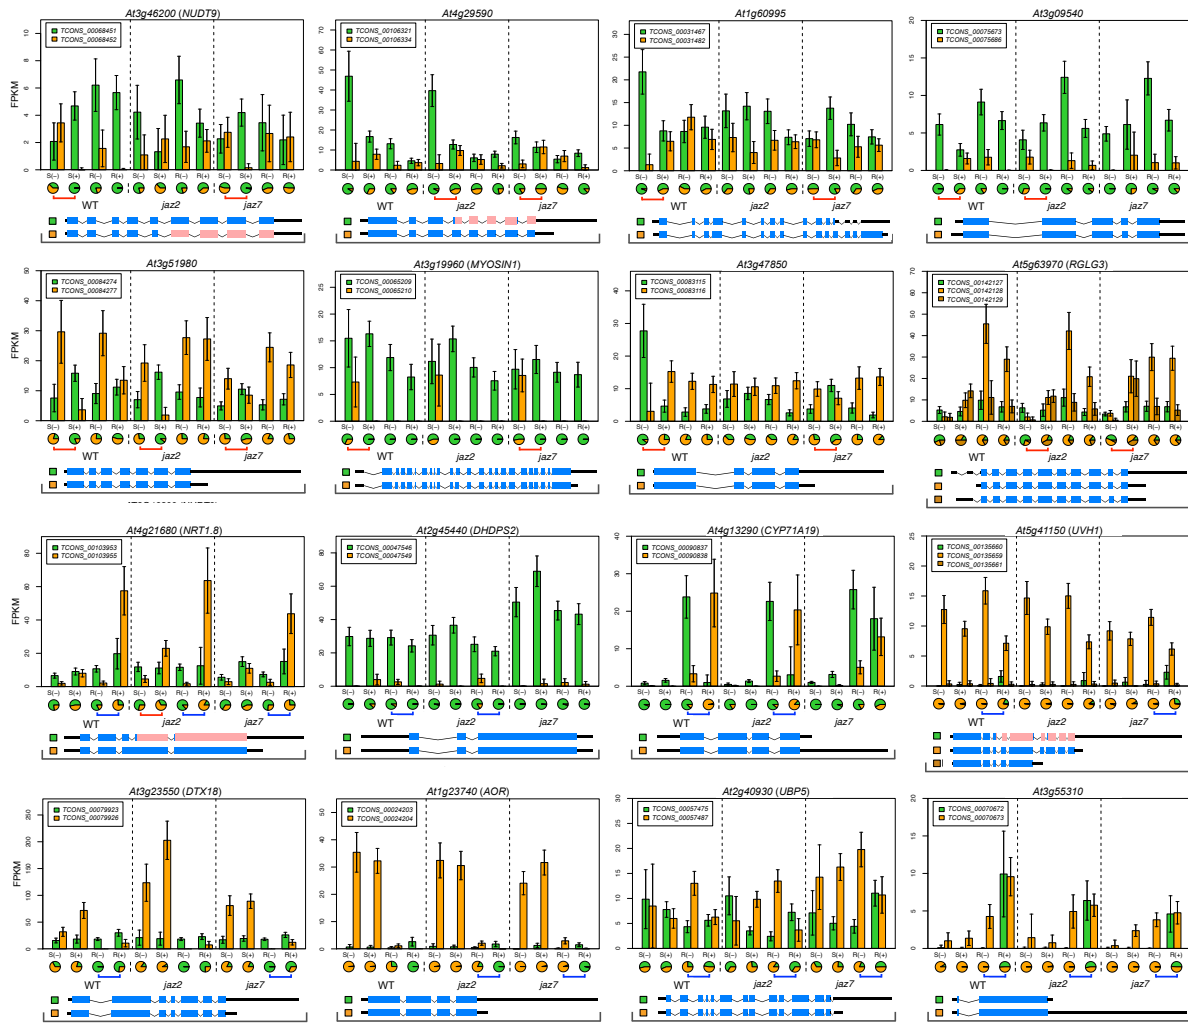

**Figure S2.** Example cases in which gene expression was regulated by AS in response to MeJA treatment. Pie charts under each condition indicate the proportion of each AS isoform present relative to the total expression from the locus. Red and blue lines under pies indicate significant differential AS in shoot and root, respectively. Under barplot are the isoform structures of the gene. Hat lines indicate introns; black thin boxes indicate UTR; blue boxes indicate CDS; pink boxes indicate regions which were turned to non-coding regions due to AS caused PTC.

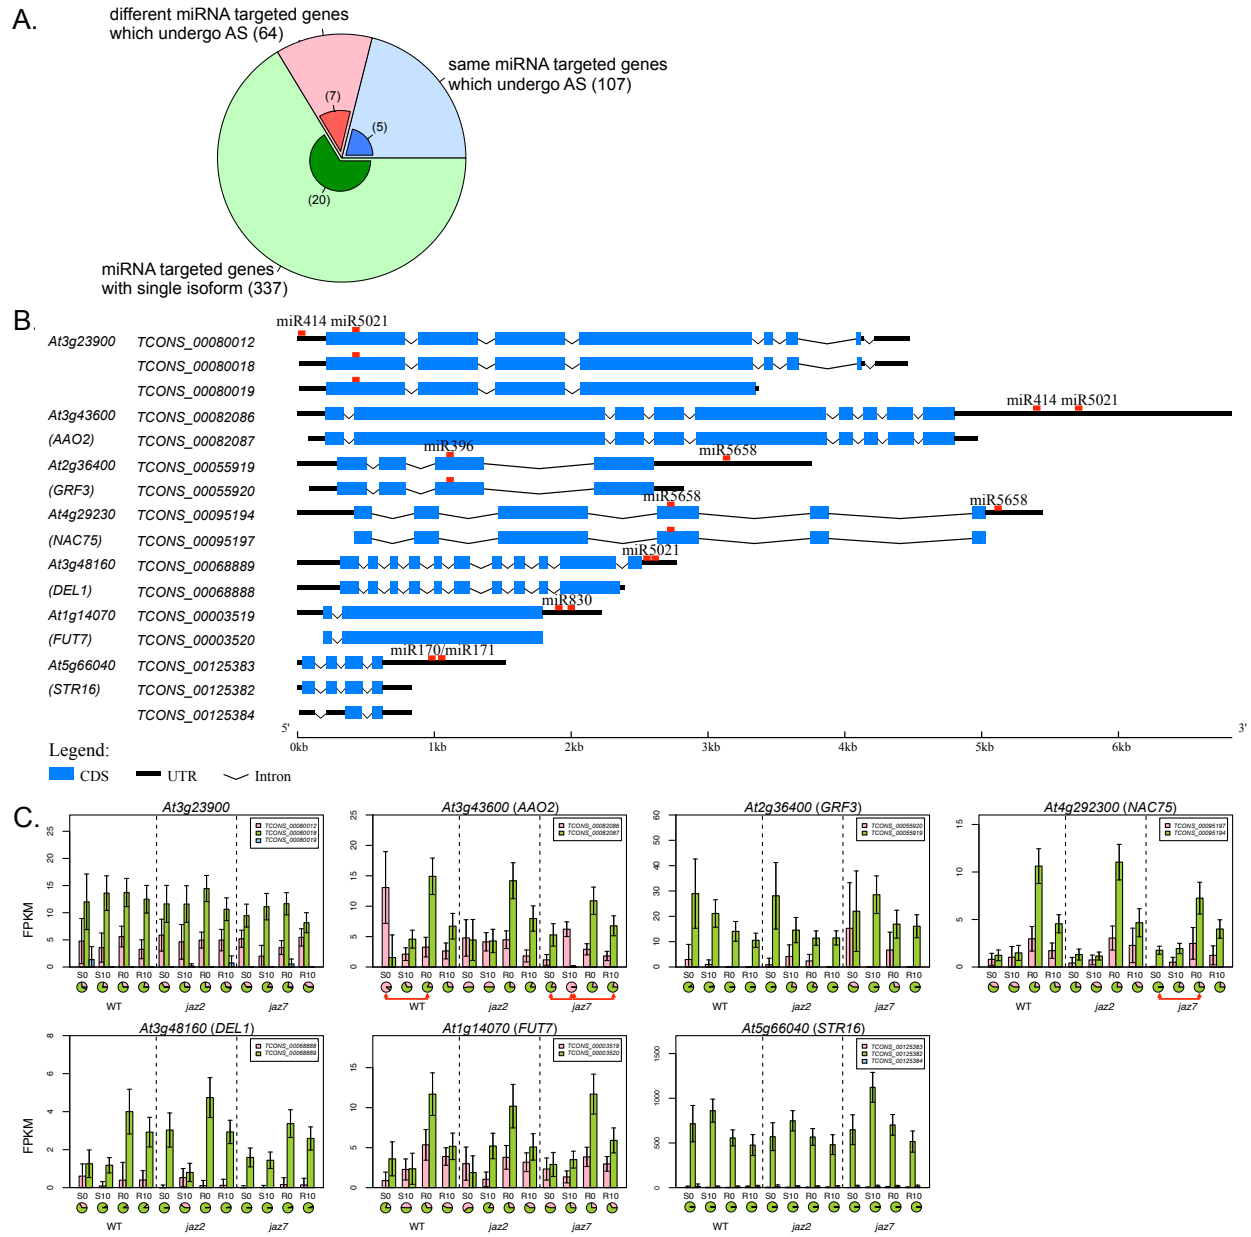

**Figure S3.** Genes undergoing AS that include miRNA binding sites that differ between isoforms.

A) Distribution of predicted miRNA target sites in genes that do not undergo AS, genes that undergo AS and AS isoforms of the gene contain different miRNA target sites and genes that undergo AS to produce isoforms with the same miRNA target sites. The darker shaded sections within each category indicate cases with multiple miRNA target sites. B) Gene structure of the seven cases (dark pink in A) with the predicted miRNA binding site indicated. C) Expression profiles of the seven genes shown in B. Pie charts under each condition indicate the proportion of

each AS isoform relative to the total expression from the locus. Significantly differential AS is indicated by red lines.

| miRNA       | No. | Gene                    | AS.diff   |   |   |   |        |   |   |   |          |   |   |   | Transcript | Target | Target site |   |   |                |                |                                                 |                                                                                                  |                                                |                                                                                                  |                                                |  |
|-------------|-----|-------------------------|-----------|---|---|---|--------|---|---|---|----------|---|---|---|------------|--------|-------------|---|---|----------------|----------------|-------------------------------------------------|--------------------------------------------------------------------------------------------------|------------------------------------------------|--------------------------------------------------------------------------------------------------|------------------------------------------------|--|
|             |     |                         | Treatment |   |   |   | Tissue |   |   |   | Genotype |   |   |   |            |        |             |   |   |                |                |                                                 |                                                                                                  |                                                |                                                                                                  |                                                |  |
|             |     |                         | a         | b | c | d | e      | f | a | b | c        | d | e | f |            |        |             | a | b | c              | d              |                                                 |                                                                                                  |                                                |                                                                                                  |                                                |  |
| ath-miR156  | 1   | AT1G35515 (MYB8/HOS10)  |           |   |   |   |        |   |   |   |          |   |   |   |            |        |             |   |   | TCONS_0008685  | 0              |                                                 |                                                                                                  |                                                |                                                                                                  |                                                |  |
|             |     |                         |           |   |   |   |        |   |   |   |          |   |   |   |            |        |             |   |   | TCONS_0008686  | 1              | ath-miR156 [798-817: CUUCUCUCUCUCUCUCUCA]       |                                                                                                  |                                                |                                                                                                  |                                                |  |
| ath-miR172  | 2   | AT3G54990 (SMZ)         |           |   |   |   |        |   |   |   |          |   |   |   |            |        |             |   |   | TCONS_00085221 | 1              | ath-miR172 [965-985: UUGCAGCAUCAUCAGGAUUC]      |                                                                                                  |                                                |                                                                                                  |                                                |  |
|             |     |                         |           |   |   |   |        |   |   |   |          |   |   |   |            |        |             |   |   | TCONS_00085222 | 0              |                                                 |                                                                                                  |                                                |                                                                                                  |                                                |  |
| ath-miR414  | 3   | AT3G43600 (AAC2)        |           |   |   |   |        |   |   |   |          |   |   |   |            |        |             |   |   |                | TCONS_00082086 | 2                                               | ath-miR414 [4777-4797: UGAUGAUGAUGAUGAAGAUGC]<br>ath-miR5021 [5090-5109: UUUUCUUCUCUCUCUCUCUCUC] |                                                |                                                                                                  |                                                |  |
|             |     |                         |           |   |   |   |        |   |   |   |          |   |   |   |            |        |             |   |   |                | TCONS_00082087 | 0                                               |                                                                                                  |                                                |                                                                                                  |                                                |  |
|             |     |                         |           |   |   |   |        |   |   |   |          |   |   |   |            |        |             |   |   |                |                | TCONS_00051815                                  | 1                                                                                                | ath-miR414 [2818-2838: GGAUGAUGAUGAUGAUGAUGA]  |                                                                                                  |                                                |  |
|             |     |                         |           |   |   |   |        |   |   |   |          |   |   |   |            |        |             |   |   |                |                | TCONS_00051822                                  | 1                                                                                                | ath-miR414 [2877-2897: GGAUGAUGAUGAUGAUGAUGA]  |                                                                                                  |                                                |  |
|             |     |                         |           |   |   |   |        |   |   |   |          |   |   |   |            |        |             |   |   |                |                |                                                 | TCONS_00051834                                                                                   | 0                                              |                                                                                                  |                                                |  |
|             | 4   | AT2G23140 (PUB4)        |           |   |   |   |        |   |   |   |          |   |   |   |            |        |             |   |   | TCONS_00137229 | 0              |                                                 |                                                                                                  |                                                |                                                                                                  |                                                |  |
|             | 5   | AT5G47040 (LON2/APEM10) |           |   |   |   |        |   |   |   |          |   |   |   |            |        |             |   |   | TCONS_00137255 | 1              | ath-miR414 [916-939: UGACAACGAUGAUGAUGAAGAUGA]  |                                                                                                  |                                                |                                                                                                  |                                                |  |
| ath-miR415  | 6   | AT4G12560 (CPR1/CPR30)  |           |   |   |   |        |   |   |   |          |   |   |   |            |        |             |   |   |                | TCONS_00090637 | 1                                               | ath-miR415 [1441-1461: CUUUUCUGUCUCUCUCUCUGUU]                                                   |                                                |                                                                                                  |                                                |  |
|             |     |                         |           |   |   |   |        |   |   |   |          |   |   |   |            |        |             |   |   |                | TCONS_00090640 | 0                                               |                                                                                                  |                                                |                                                                                                  |                                                |  |
|             |     |                         |           |   |   |   |        |   |   |   |          |   |   |   |            |        |             |   |   |                |                | TCONS_00090641                                  | 1                                                                                                | ath-miR415 [1396-1416: CUUUUCUGUCUCUCUCUCUGUU] |                                                                                                  |                                                |  |
| ath-miR472  | 7   | AT5G43730 (RSG2)        |           |   |   |   |        |   |   |   |          |   |   |   |            |        |             |   |   |                | TCONS_00119400 | 0                                               |                                                                                                  |                                                |                                                                                                  |                                                |  |
|             |     |                         |           |   |   |   |        |   |   |   |          |   |   |   |            |        |             |   |   |                |                | TCONS_00119402                                  | 1                                                                                                | ath-miR472 [1313-1334: GGU AUGGGGGGAAUAGGAAAA] |                                                                                                  |                                                |  |
|             |     |                         |           |   |   |   |        |   |   |   |          |   |   |   |            |        |             |   |   |                |                | TCONS_00119403                                  | 1                                                                                                | ath-miR472 [1313-1334: GGU AUGGGGGGAAUAGGAAAA] |                                                                                                  |                                                |  |
|             |     |                         |           |   |   |   |        |   |   |   |          |   |   |   |            |        |             |   |   |                |                |                                                 | TCONS_00119404                                                                                   | 0                                              |                                                                                                  |                                                |  |
|             |     |                         |           |   |   |   |        |   |   |   |          |   |   |   |            |        |             |   |   |                |                |                                                 | TCONS_00003955                                                                                   | 0                                              |                                                                                                  |                                                |  |
|             | 8   | AT1G15885               |           |   |   |   |        |   |   |   |          |   |   |   |            |        |             |   |   | TCONS_00003956 | 1              | ath-miR472 [1191-1212: GGU AUGGGGGGAGUAGGUAAAA] |                                                                                                  |                                                |                                                                                                  |                                                |  |
| ath-miR5021 | 9   | AT4G19670               |           |   |   |   |        |   |   |   |          |   |   |   |            |        |             |   |   |                | TCONS_00103441 | 1                                               | ath-miR5021 [47-67: UUCUUCUUCUUCUUCUUCUCU]                                                       |                                                |                                                                                                  |                                                |  |
|             |     |                         |           |   |   |   |        |   |   |   |          |   |   |   |            |        |             |   |   |                |                | TCONS_00103442                                  | 1                                                                                                | ath-miR5021 [47-67: UUCUUCUUCUUCUUCUUCUCU]     |                                                                                                  |                                                |  |
|             |     |                         |           |   |   |   |        |   |   |   |          |   |   |   |            |        |             |   |   |                |                |                                                 | TCONS_00103445                                                                                   | 0                                              |                                                                                                  |                                                |  |
|             |     |                         |           |   |   |   |        |   |   |   |          |   |   |   |            |        |             |   |   |                |                |                                                 | TCONS_00103446                                                                                   | 1                                              | ath-miR5021 [44-64: UUCUUCUUCUUCUUCUUCUCU]                                                       |                                                |  |
|             |     |                         |           |   |   |   |        |   |   |   |          |   |   |   |            |        |             |   |   |                |                |                                                 | TCONS_00042668                                                                                   | 0                                              |                                                                                                  |                                                |  |
|             |     |                         |           |   |   |   |        |   |   |   |          |   |   |   |            |        |             |   |   |                |                |                                                 |                                                                                                  | TCONS_00042669                                 | 0                                                                                                |                                                |  |
|             |     |                         |           |   |   |   |        |   |   |   |          |   |   |   |            |        |             |   |   |                |                |                                                 |                                                                                                  | TCONS_00042670                                 | 1                                                                                                | ath-miR5021 [24-44: UUCUUCUUCUUCUUCUUCUCU]     |  |
|             |     |                         |           |   |   |   |        |   |   |   |          |   |   |   |            |        |             |   |   |                |                |                                                 |                                                                                                  | TCONS_00059096                                 | 0                                                                                                |                                                |  |
|             |     |                         |           |   |   |   |        |   |   |   |          |   |   |   |            |        |             |   |   |                |                |                                                 |                                                                                                  | TCONS_00059100                                 | 1                                                                                                | ath-miR5021 [128-147: CUUUCUUCUUCUUCUUCUCU]    |  |
|             |     |                         |           |   |   |   |        |   |   |   |          |   |   |   |            |        |             |   |   |                |                |                                                 |                                                                                                  | TCONS_00060511                                 | 1                                                                                                | ath-miR5021 [114-133: UUUUCUUCUUCUUCUUCUUU]    |  |
| ath-miR5021 | 12  | AT3G02740               |           |   |   |   |        |   |   |   |          |   |   |   |            |        |             |   |   |                |                | TCONS_00060512                                  | 0                                                                                                |                                                |                                                                                                  |                                                |  |
|             |     |                         |           |   |   |   |        |   |   |   |          |   |   |   |            |        |             |   |   |                |                |                                                 | TCONS_00074206                                                                                   | 1                                              | ath-miR5021 [1620-1640: UUCUUCUUCUUCUUCUUCUCU]                                                   |                                                |  |
|             |     |                         |           |   |   |   |        |   |   |   |          |   |   |   |            |        |             |   |   |                |                |                                                 | TCONS_00074207                                                                                   | 0                                              |                                                                                                  |                                                |  |
|             |     |                         |           |   |   |   |        |   |   |   |          |   |   |   |            |        |             |   |   |                |                |                                                 |                                                                                                  | TCONS_00082295                                 | 1                                                                                                | ath-miR5021 [18-38: UUCUUCUUCUUCUUCUUCUCU]     |  |
|             |     |                         |           |   |   |   |        |   |   |   |          |   |   |   |            |        |             |   |   |                |                |                                                 |                                                                                                  | TCONS_00082304                                 | 0                                                                                                |                                                |  |
|             |     |                         |           |   |   |   |        |   |   |   |          |   |   |   |            |        |             |   |   |                |                |                                                 |                                                                                                  | TCONS_00101323                                 | 1                                                                                                | ath-miR5021 [2480-2500: UUUUAUCUUCUUCUUCUUCUC] |  |
|             |     |                         |           |   |   |   |        |   |   |   |          |   |   |   |            |        |             |   |   |                |                |                                                 |                                                                                                  | TCONS_00101325                                 | 0                                                                                                |                                                |  |
|             |     |                         |           |   |   |   |        |   |   |   |          |   |   |   |            |        |             |   |   |                |                |                                                 |                                                                                                  | TCONS_00124016                                 | 1                                                                                                | ath-miR5021 [57-76: UUUUUUUGUUCUUCUCUCA]       |  |
| ath-miR5641 | 17  | AT5G55530               |           |   |   |   |        |   |   |   |          |   |   |   |            |        |             |   |   |                |                | TCONS_00124018                                  | 0                                                                                                |                                                |                                                                                                  |                                                |  |
|             |     |                         |           |   |   |   |        |   |   |   |          |   |   |   |            |        |             |   |   |                |                |                                                 | TCONS_00122678                                                                                   | 0                                              |                                                                                                  |                                                |  |
|             |     |                         |           |   |   |   |        |   |   |   |          |   |   |   |            |        |             |   |   |                |                |                                                 |                                                                                                  | TCONS_00122680                                 | 0                                                                                                |                                                |  |
|             |     |                         |           |   |   |   |        |   |   |   |          |   |   |   |            |        |             |   |   |                |                |                                                 |                                                                                                  | TCONS_00122682                                 | 0                                                                                                |                                                |  |
|             |     |                         |           |   |   |   |        |   |   |   |          |   |   |   |            |        |             |   |   |                |                |                                                 |                                                                                                  | TCONS_00122683                                 | 1                                                                                                | ath-miR5641 [60-80: UCUUUCUAUCAUCUUCUUA]       |  |
|             |     |                         |           |   |   |   |        |   |   |   |          |   |   |   |            |        |             |   |   |                |                |                                                 |                                                                                                  | TCONS_00119648                                 | 1                                                                                                | ath-miR5641 [1180-1200: UUAUUUAUCAUCUUCUUCU]   |  |
|             |     |                         |           |   |   |   |        |   |   |   |          |   |   |   |            |        |             |   |   |                |                |                                                 |                                                                                                  | TCONS_00119653                                 | 1                                                                                                | ath-miR5641 [1180-1200: UUAUUUAUCAUCUUCUUCU]   |  |
|             |     |                         |           |   |   |   |        |   |   |   |          |   |   |   |            |        |             |   |   |                |                |                                                 |                                                                                                  |                                                | TCONS_00119656                                                                                   | 0                                              |  |
|             |     |                         |           |   |   |   |        |   |   |   |          |   |   |   |            |        |             |   |   |                |                |                                                 |                                                                                                  |                                                | TCONS_00124898                                                                                   | 0                                              |  |
|             |     |                         |           |   |   |   |        |   |   |   |          |   |   |   |            |        |             |   |   |                |                |                                                 |                                                                                                  |                                                | TCONS_00124899                                                                                   | 0                                              |  |
| ath-miR5658 | 19  | AT5G64330 (NPH3/RPT3)   |           |   |   |   |        |   |   |   |          |   |   |   |            |        |             |   |   |                |                | TCONS_00124902                                  | 1                                                                                                | ath-miR5658 [3646-3666: AAUCAUCAUCAUAAUCAUCAU] |                                                                                                  |                                                |  |
|             |     |                         |           |   |   |   |        |   |   |   |          |   |   |   |            |        |             |   |   |                |                |                                                 | TCONS_00095194                                                                                   | 2                                              | ath-miR5658 [1487-1507: GAUCAUCACCAUCAUCAUCAU]<br>ath-miR5658 [1981-2001: GCUCAUCGUCAUCAUCAUCAU] |                                                |  |
| ath-miR5658 | 20  | AT4G29230 (NAC75)       |           |   |   |   |        |   |   |   |          |   |   |   |            |        |             |   |   |                |                | TCONS_00095197                                  | 1                                                                                                | ath-miR5658 [1078-1098: GAUCAUCACCAUCAUCAUCAU] |                                                                                                  |                                                |  |
|             |     |                         |           |   |   |   |        |   |   |   |          |   |   |   |            |        |             |   |   |                |                |                                                 | TCONS_00004939                                                                                   | 0                                              |                                                                                                  |                                                |  |
| ath-miR8177 | 21  | AT1G18880 (NPF2.9)      |           |   |   |   |        |   |   |   |          |   |   |   |            |        |             |   |   |                | TCONS_00004941 | 1                                               | ath-miR8177 [3771-3791: UA-GAGUGACACAUCAUCAACA]                                                  |                                                |                                                                                                  |                                                |  |

**Figure S4.** Twenty-one genes which contain miRNA binding sites potentially subjected to AS regulation. Blue, green and yellow shading indicate significantly changed isoform proportions identified in treatment, tissue or genotype comparisons, respectively. Targeted sequences within the transcript and their locations are presented within brackets [ ] in the “Target site” column.

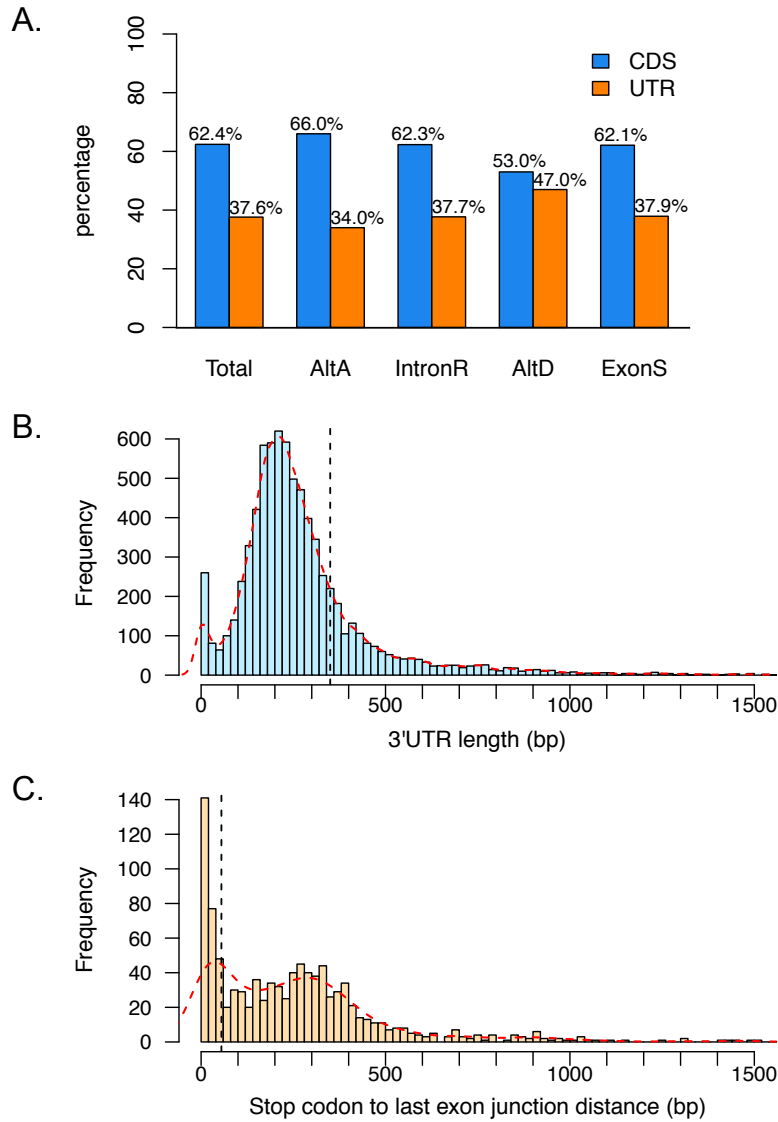

**Figure S5.** Cases in which AS won't generate multiple protein products. A) Distribution of AS events occurring within the CDS or UTRs. B) Distribution of 3'-UTR lengths of all identified transcripts. C) Distribution of the distance between the stop codon and the last exon junction when the stop codon is not within the last exon of the transcript.

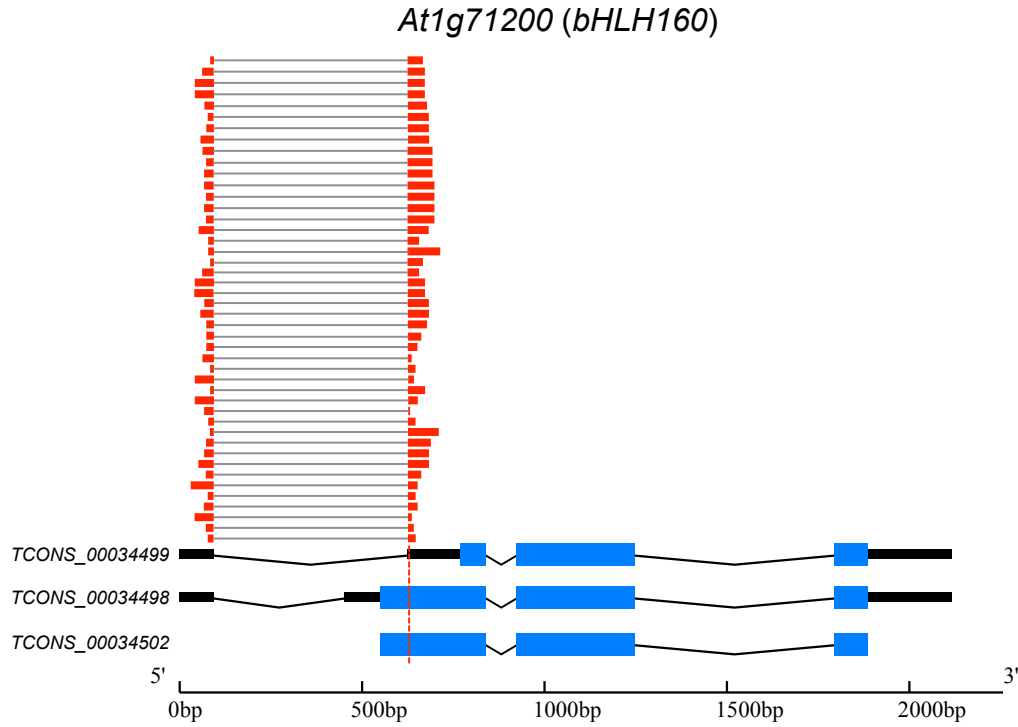

**Figure S6.** Mapped reads from the MeJA project supporting the AS junction in *Arabidopsis bHLH160<sup>b</sup>*. Hat lines indicate introns; black thin boxes indicate UTR; blue boxes indicate CDS. Gray line connected red boxes indicate mapped reads supporting the novel junction in the alternative isoform *TCNS\_00034499*.



A.

*SPL4*

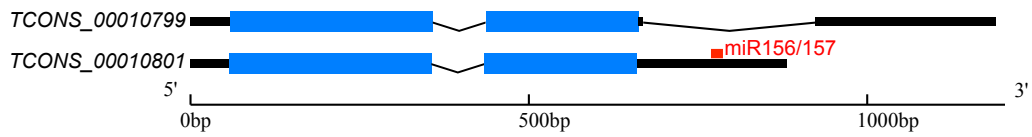

B.

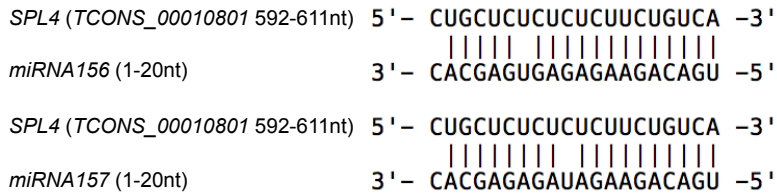

**Figure S7.** Differential miRNA regulation of *SPL4* splice variants. A) Gene structure of *SPL4* AS isoforms with the predicted miRNA binding site indicated. B) Complementarity of the miRNA with the predicted *SPL4* target site.

**Table S1.** RNA-seq library and mapping information.

| Samples            | # Raw reads | # Mapped reads | Percentage |
|--------------------|-------------|----------------|------------|
| WT_shoot_0_rep1    | 21,128,469  | 17,025,286     | 80.6%      |
| WT_shoot_0_rep2    | 14,186,832  | 8,909,077      | 62.8%      |
| WT_shoot_0_rep3    | 23,486,963  | 8,769,393      | 37.3%      |
| WT_shoot_10_rep1   | 13,657,112  | 10,920,597     | 80.0%      |
| WT_shoot_10_rep2   | 16,134,503  | 12,685,395     | 78.6%      |
| WT_shoot_10_rep3   | 13,510,226  | 10,641,409     | 78.8%      |
| WT_root_0_rep1     | 15,241,432  | 12,494,869     | 82.0%      |
| WT_root_0_rep2     | 40,886,447  | 32,315,025     | 79.0%      |
| WT_root_0_rep3     | 22,960,991  | 18,992,644     | 82.7%      |
| WT_root_10_rep1    | 15,351,676  | 13,060,948     | 85.1%      |
| WT_root_10_rep2    | 17,683,061  | 14,960,418     | 84.6%      |
| WT_root_10_rep3    | 15,102,434  | 12,796,169     | 84.7%      |
| jaz2_shoot_0_rep1  | 15,032,167  | 10,950,279     | 72.8%      |
| jaz2_shoot_0_rep2  | 11,958,237  | 9,261,665      | 77.5%      |
| jaz2_shoot_0_rep3  | 9,277,191   | 5,794,838      | 62.5%      |
| jaz2_shoot_10_rep1 | 11,154,705  | 8,481,602      | 76.0%      |
| jaz2_shoot_10_rep2 | 11,431,445  | 8,887,788      | 77.7%      |
| jaz2_shoot_10_rep3 | 11,715,590  | 9,311,499      | 79.5%      |
| jaz2_root_0_rep1   | 15,850,717  | 13,107,489     | 82.7%      |
| jaz2_root_0_rep2   | 17,974,716  | 15,159,325     | 84.3%      |
| jaz2_root_0_rep3   | 17,514,424  | 14,196,519     | 81.1%      |
| jaz2_root_10_rep1  | 16,661,319  | 13,609,917     | 81.7%      |
| jaz2_root_10_rep2  | 23,840,265  | 19,031,731     | 79.8%      |
| jaz2_root_10_rep3  | 18,466,668  | 15,379,759     | 83.3%      |
| jaz7_shoot_0_rep1  | 10,507,564  | 8,446,985      | 80.4%      |
| jaz7_shoot_0_rep2  | 10,564,614  | 8,097,926      | 76.7%      |
| jaz7_shoot_0_rep3  | n.a.        | n.a.           | n.a.       |
| jaz7_shoot_10_rep1 | 12,594,778  | 9,115,023      | 72.4%      |

To be continue

| Samples            | # Raw reads | # Mapped reads | Percentage |
|--------------------|-------------|----------------|------------|
| jaz7_shoot_10_rep2 | 17,867,067  | 13,564,544     | 75.9%      |
| jaz7_shoot_10_rep3 | 15,161,488  | 11,884,760     | 78.4%      |
| jaz7_root_0_rep1   | 17,388,880  | 14,375,611     | 82.7%      |
| jaz7_root_0_rep2   | 17,181,387  | 14,247,505     | 82.9%      |
| jaz7_root_0_rep3   | 15,300,499  | 13,159,910     | 86.0%      |
| jaz7_root_10_rep1  | 16,636,604  | 13,859,228     | 83.3%      |
| jaz7_root_10_rep2  | 13,528,403  | 11,442,447     | 84.6%      |
| jaz7_root_10_rep3  | 20,662,422  | 17,233,780     | 83.4%      |
| Total              | 577,601,296 | 452,171,360    | 78.3%      |
